# Supplementary material
Source: publisher figshare collection journal article supplement (https://future-science-group.figshare.com/ndownloader/files/27924531)
Supplement: Supplementary file 1 [file 27924531]

# A novel gene therapy for neurodegenerative Lafora disease via *EPM2A*-loaded DLinDMA lipoplexes

## Supplemental Fig. 1

### Silencing of endogenous laforin

HEK293 cells were seeded in 100 mm dishes at density of  $1 \times 10^6$  cells per dish. After 16 h of plating, cells were transfected with laforin siRNA (Life Technologies, assay id s15500) for 24 h. Cells were then transfected with 1:20 mass ratio of FLAG laforin:DLinDMA liposomes. Cells were lysed after transfection for 48 h. The cell lysates were then processed for Western blotting.

## Supplemental Fig. 1

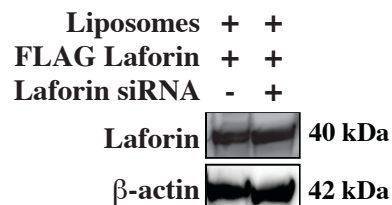

Western blot image of laforin expression in laforin siRNA-treated HEK293 cells after subsequent reconstitution using FLAG laforin:DLinDMA liposomes in 1:20 mass ratio.
